# Supplementary material for: Profiles of lipid, protein and microRNA expression in exosomes derived from intestinal epithelial cells after ischemia-reperfusion injury in a cellular hypoxia model
Source: PubMed Central journal article supplement (PMC10058167; doi:10.1371/journal.pone.0283702), 2023-03-29

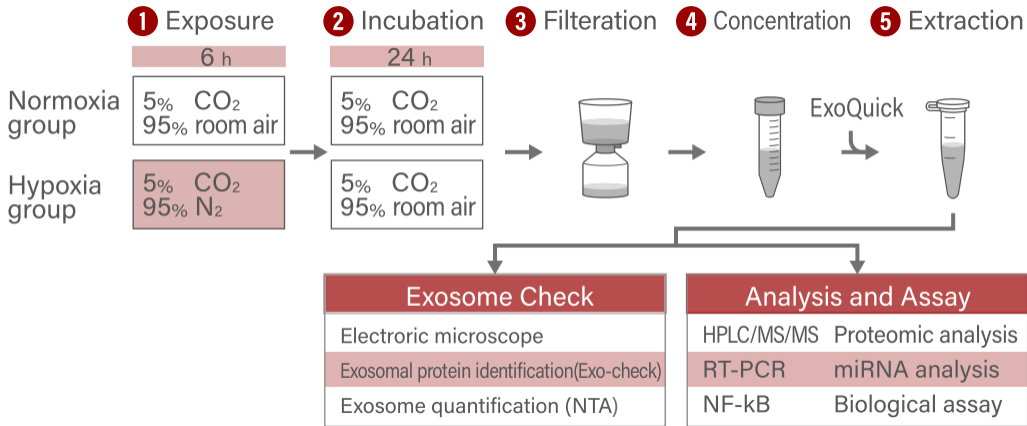

Supplement: pone.0283702.s002.pdf [file pone.0283702.s002.pdf]
